# Supplementary material for: Therapeutic Effect, Rheological Properties and α-Amylase Resistance of a New Mixed Starch and Xanthan Gum Thickener on Four Different Phenotypes of Patients with Oropharyngeal Dysphagia
Source: PubMed Central journal article supplement (PMC7353421; doi:10.3390/nu12061873), 2020-06-23
Supplement: nutrients-12-01873-s001.pdf [file nutrients-12-01873-s001.pdf]

SUPPLEMENTARY FIGURES

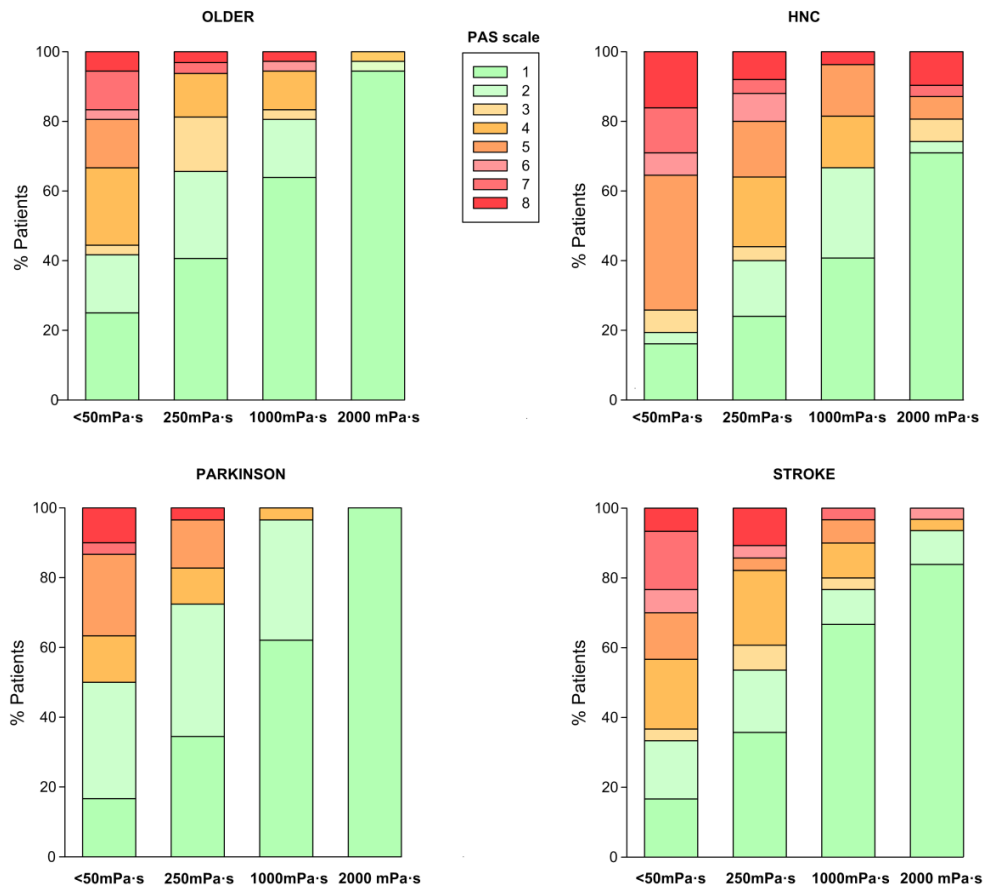

**Figure S1.** Penetration Aspiration Scale (PAS) score frequency between viscosities and patients. PAS 1–2 indicates safe swallow and PAS 3–8, unsafe swallow; HNC, head and neck cancer.

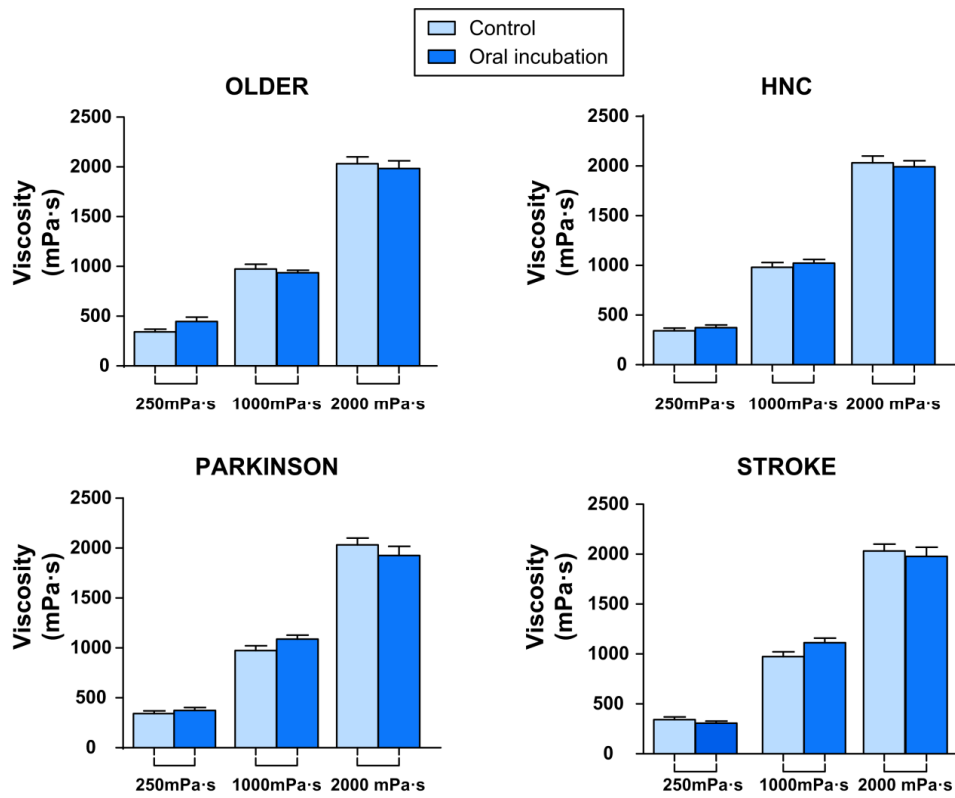

**Figure S2.** Effect of saliva (samples with saliva) on viscosity measured with a rotational viscometer within groups.

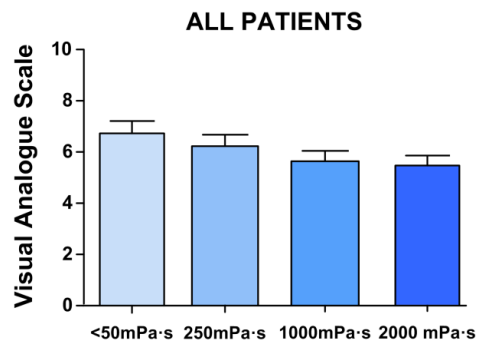

**Figure S3.** Palatability of the study product presented for all patients valuated with a visual analogue scale (0–10).

SUPPLEMENTARY TABLES

**Table S1.** Comparison between viscosities of oral residue among the study groups. *HNC: Head and neck cancer.*

| <b>OLDER</b>        | <b>&lt;50mPa·s<br/>(n=36)</b> | <b>250mPa·s<br/>(n=32)</b> | <b>1000mPa·s<br/>(n=36)</b> | <b>2000mPa·s<br/>(n=36)</b> |
|---------------------|-------------------------------|----------------------------|-----------------------------|-----------------------------|
| <b>Oral residue</b> | 63.89% (23)                   | 90.63% (29)                | 86.11% (31)                 | 72.22% (26)                 |
| <50mPa·s            |                               | 0.008                      | 0.013                       | 0.752                       |
| 250mPa·s            |                               |                            | 1.000                       | 0.023                       |
| 1000mPa·s           |                               |                            |                             | 0.041                       |
| <b>HNC</b>          | <b>&lt;50mPa·s<br/>(n=31)</b> | <b>250mPa·s<br/>(n=25)</b> | <b>1000mPa·s<br/>(n=27)</b> | <b>2000mPa·s<br/>(n=31)</b> |
| <b>Oral residue</b> | 45.16% (14)                   | 64.00% (16)                | 66.67% (18)                 | 64.52% (20)                 |
| Liquid              |                               | 0.041                      | 0.046                       | 0.114                       |
| Nectar              |                               |                            | 0.683                       | 0.617                       |
| Honey               |                               |                            |                             | 0.683                       |
| Pudding             |                               |                            |                             |                             |
| <b>PARKINSON</b>    | <b>&lt;50mPa·s<br/>(n=30)</b> | <b>250mPa·s<br/>(n=29)</b> | <b>1000mPa·s<br/>(n=30)</b> | <b>2000mPa·s<br/>(n=30)</b> |
| <b>Oral residue</b> | 33.33% (10)                   | 62.07% (18)                | 56.67% (17)                 | 53.33% (16)                 |
| <50mPa·s            |                               | 0.027                      | 0.070                       | 0.077                       |
| 250mPa·s            |                               |                            | 1.000                       | 0.683                       |
| 1000mPa·s           |                               |                            |                             | 1.000                       |
| <b>STROKE</b>       | <b>&lt;50mPa·s<br/>(n=30)</b> | <b>250mPa·s<br/>(n=28)</b> | <b>1000mPa·s<br/>(n=30)</b> | <b>2000mPa·s<br/>(n=31)</b> |
| <b>Oral residue</b> | 30.00% (9)                    | 46.46% (13)                | 50.00% (15)                 | 54.84% (17)                 |
| <50mPa·s            |                               | 0.131                      | 0.073                       | 0.023                       |
| 250mPa·s            |                               |                            | 0.683                       | 0.683                       |
| 1000mPa·s           |                               |                            |                             | 0.617                       |

**Table S2.** Comparison between viscosities of pharyngeal residue among the study groups. *HNC: Head and neck cancer.*

| <b>OLDER</b>              | <b>&lt;50mPa·s<br/>(n=36)</b> | <b>250mPa·s<br/>(n=32)</b> | <b>1000mPa·s<br/>(n=36)</b> | <b>2000mPa·s<br/>(n=36)</b> |
|---------------------------|-------------------------------|----------------------------|-----------------------------|-----------------------------|
| <b>Pharyngeal residue</b> | 50.00% (18)                   | 59.38% (19)                | 52.78% (19)                 | 55.56% (20)                 |
| <50mPa·s                  |                               | 0.450                      | 1.000                       | 0.724                       |
| 250mPa·s                  |                               |                            | 0.683                       | 1.000                       |
| 1000mPa·s                 |                               |                            |                             | 1.000                       |
| <b>HNC</b>                | <b>&lt;50mPa·s<br/>(n=31)</b> | <b>250mPa·s<br/>(n=25)</b> | <b>1000mPa·s<br/>(n=27)</b> | <b>2000mPa·s<br/>(n=31)</b> |
| <b>Pharyngeal residue</b> | 87.10% (27)                   | 92.00% (23)                | 88.89% (24)                 | 93.55% (29)                 |
| <50mPa·s                  |                               | 0.475                      | 1.000                       | 0.480                       |
| 250mPa·s                  |                               |                            | 1.000                       | 0.480                       |
| 1000mPa·s                 |                               |                            |                             | 1.000                       |
| <b>PARKINSON</b>          | <b>&lt;50mPa·s<br/>(n=30)</b> | <b>250mPa·s<br/>(n=29)</b> | <b>1000mPa·s<br/>(n=30)</b> | <b>2000mPa·s<br/>(n=30)</b> |
| <b>Pharyngeal residue</b> | 60.00% (18)                   | 72.41% (21)                | 73.33% (22)                 | 76.67% (23)                 |
| <50mPa·s                  |                               | 0.371                      | 0.221                       | 0.074                       |
| 250mPa·s                  |                               |                            | 1.000                       | 1.000                       |
| 1000mPa·s                 |                               |                            |                             | 1.000                       |
| <b>STROKE</b>             | <b>&lt;50mPa·s<br/>(n=30)</b> | <b>250mPa·s<br/>(n=28)</b> | <b>1000mPa·s<br/>(n=30)</b> | <b>2000mPa·s<br/>(n=31)</b> |
| <b>Pharyngeal residue</b> | 43.33% (13)                   | 60.71% (17)                | 66.67% (20)                 | 61.29% (19)                 |
| <50mPa·s                  |                               | 0.450                      | 0.077                       | 0.182                       |
| 250mPa·s                  |                               |                            | 0.371                       | 1.000                       |
| 1000mPa·s                 |                               |                            |                             | 1.000                       |
